# Supplementary figures and images for: Effectiveness of a ‘Do not interrupt’ bundled intervention to reduce interruptions during medication administration: a cluster randomised controlled feasibility study
Source: PubMed Central journal article supplement — BMJ Qual Saf. 2017 Feb 23;26(9):734–42. doi: 10.1136/bmjqs-2016-006123 (PMC5574391; doi:10.1136/bmjqs-2016-006123), 2017-02-23

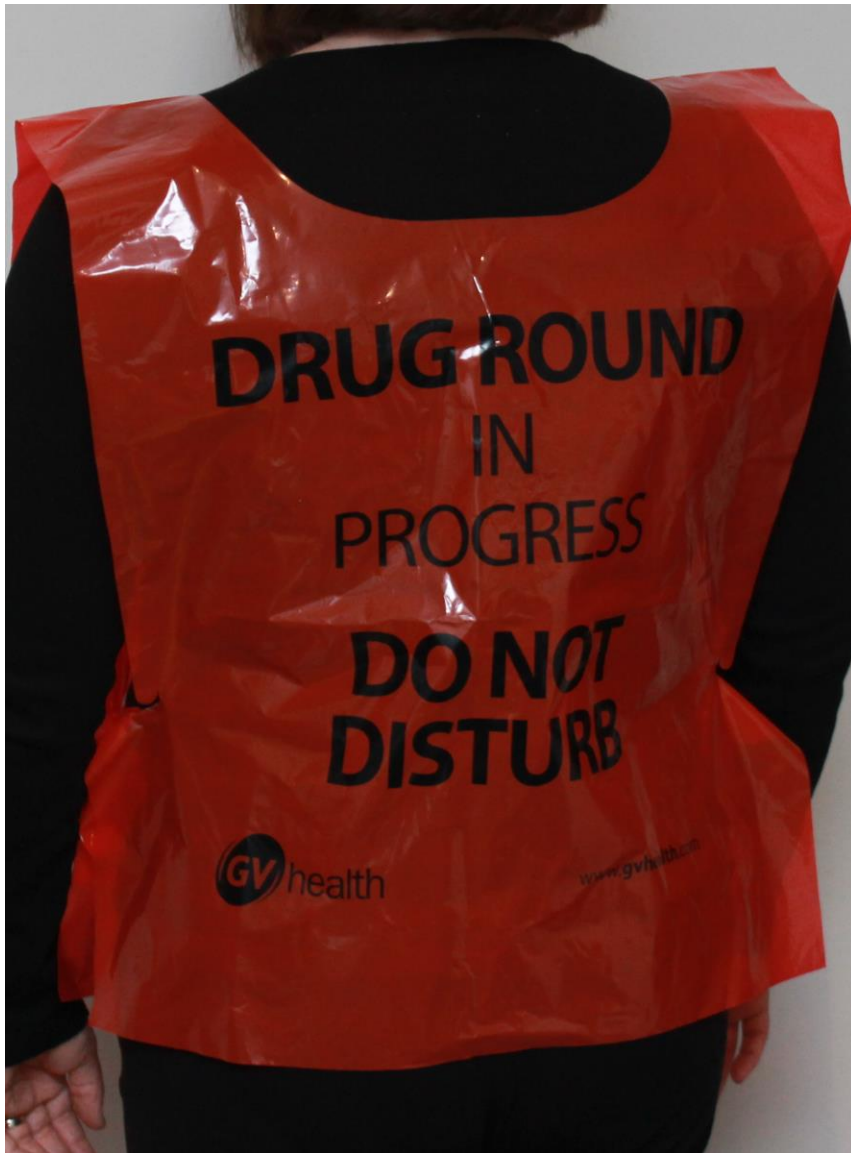

Supplement: bmjqs-2016-006123supp001.pdf [file bmjqs-2016-006123supp001.pdf]
